# Supplementary material for: Super-Antioxidant Vitamin A Derivatives with Improved Stability and Efficacy Using Skin-Permeable Chitosan Nanocapsules
Source: MDPI journal article supplement (doi:10.3390/antiox12111913), 2023-10-26
Supplement: s1 [file s1]

## Supporting Information

# Super-Antioxidant Vitamin A Derivatives with Improved Stability and Efficacy Using Skin-Permeable Chitosan Nanocapsules

Hyeryeon Oh <sup>1,2,†</sup>, Jin Sil Lee <sup>1,2,†</sup>, Sunghyun Kim <sup>1</sup>, Jeung-Hoon Lee <sup>3</sup>, Yong Chul Shin <sup>3,4</sup> and Won Il Choi <sup>1,\*</sup>

<sup>1</sup> Center for Bio-Healthcare Materials, Bio-Convergence Materials R&D Division, Korea Institute of Ceramic Engineering and Technology, 202, Osongsaengmyeong 1-ro, Cheongju 28160, Republic of Korea; hyeryeon.oh@kicet.re.kr (H.O.); jslee92@kicet.re.kr (J.S.L.); shkim0519@kicet.re.kr (S.K.)

<sup>2</sup> School of Materials Science and Engineering, Gwangju Institute of Science and Technology, 123, Cheomdan-gwagi-ro, Gwangju 61005, Republic of Korea

<sup>3</sup> SKINMED Co., Ltd., Daejeon 34028, Republic of Korea; jhoon@cnu.ac.kr (J.-H.L.); ycshin@amicogen.com (Y.C.S.)

<sup>4</sup> Amicogen Inc., 64 Dongburo, 1259, Jinju 52621, Republic of Korea

\* Correspondence: choi830509@kicet.re.kr; Tel.: +82-43-913-1513

† These authors contributed equally to this work.

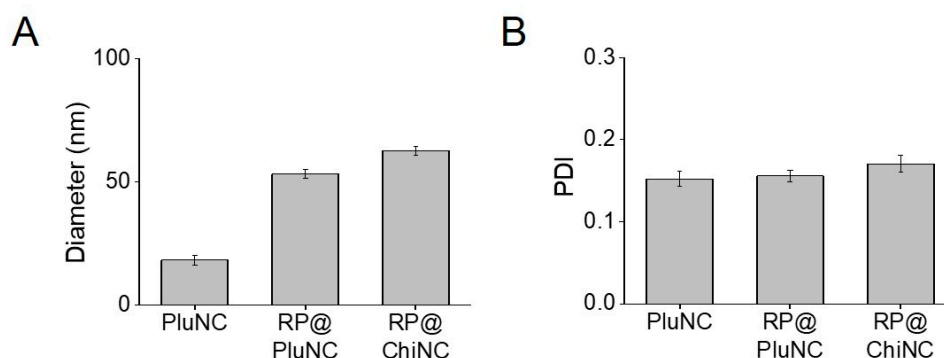

**Figure S1.** Characterization of PluNC, RP@PluNC, and RP@ChiNC. (A) Hydrodynamic diameters and (B) polydispersity indices (PDI) of PluNC, RP@PluNC, and RP@ChiNC.

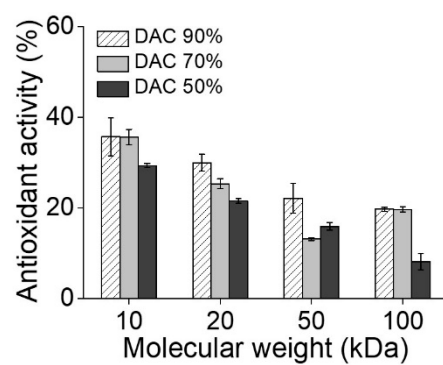

**Figure S2.** DPPH radical scavenging activities of 12 types of chitosan with different percentages of deacetylation and molecular weights.
